# Supplementary material
Source: MDPI journal article supplement (https://www.mdpi.com/2673-3897/5/2/5)
Supplement: s1 [file s1]

**Table S1. Change in WBC Indices by Vaginal Laceration Type.**

|                          | None               | Abrasio<br>n,<br>periuret<br>hral or<br>periclito<br>ral | First-<br>degree | Second-<br>degree | Third-<br>degree | Fourth-<br>degree | <i>P</i> Value |
|--------------------------|--------------------|----------------------------------------------------------|------------------|-------------------|------------------|-------------------|----------------|
| $\Delta$ WBC $\pm$<br>SD | 2.71 $\pm$<br>3.39 | 3.41 $\pm$<br>3.71                                       | 3.11 $\pm$ 3.52  | 4.18 $\pm$ 4.03   | 4.99 $\pm$ 4.34  | 5.74 $\pm$ 4.64   | $P < 0.001^1$  |

<sup>1</sup> ANOVA

Abbreviations: WBC, white blood cell; SD, standard deviation

All values are presented as mean change  $\pm$  standard deviation.**Table S2. Change in WBC Indices with Supplemental Uterotonics\***

|                       | Control<br>( <i>n</i> = 2004) | Uterotonics<br>( <i>n</i> = 241) | <i>P</i> value |
|-----------------------|-------------------------------|----------------------------------|----------------|
| $\Delta$ WBC $\pm$ SD | 2.99 $\pm$ 3.52               | 4.64 $\pm$ 4.27                  | $P < 0.001^1$  |

<sup>1</sup> Student's t-test

\*Defined as uterotonics in addition to oxytocin

Abbreviations: WBC, white blood cell; SD, standard deviation

All values are presented as mean change  $\pm$  standard deviation.
